# Supplementary material for: Size-, electric-field-, and frequency-dependent third-order nonlinear optical properties of hydrogenated silicon nanoclusters
Source: PubMed Central journal article supplement (PMC4910094; doi:10.1038/srep28067), 2016-06-16
Supplement: srep28067-s1.pdf [file srep28067-s1.pdf]

# Size-, electric-field-, and frequency-dependent third-order nonlinear optical properties of hydrogenated silicon nanoclusters

Haipeng Li<sup>1</sup>, Hu Xu<sup>2</sup>, Xiaopeng Shen<sup>1</sup>, Kui Han<sup>1</sup>, Zetong Bi<sup>1</sup> & Ruifeng Xu<sup>1</sup>

<sup>1</sup>Department of Physics, China University of Mining and Technology, Xuzhou, 221116, China

<sup>2</sup>Department of Physics, South University of Science and Technology of China, Shenzhen, 518055, China

**Table S1:** Effects of electric field  $F_i$  on the energy gap  $E_{HL}$  and the average second hyperpolarizability  $\langle\gamma\rangle$  for the  $\text{Si}_{10}\text{H}_{16}$  cluster

| $F_i/\text{au}$ | $E_{HL}/\text{eV}$ | $\langle\gamma\rangle/10^{-61}\text{C}^4\text{m}^4\text{J}^{-3}$ |
|-----------------|--------------------|------------------------------------------------------------------|
| $F_x=0.00$      | 6.88               | 46.58                                                            |
| $F_x=0.01$      | 6.35               | 54.24                                                            |
| $F_x=0.03$      | 4.64               | 530.80                                                           |
| $F_y=0.00$      | 6.88               | 46.58                                                            |
| $F_y=0.01$      | 6.34               | 54.18                                                            |
| $F_y=0.03$      | 4.47               | 694.25                                                           |
| $F_z=0.00$      | 6.88               | 46.58                                                            |
| $F_z=0.01$      | 6.35               | 54.25                                                            |
| $F_z=0.03$      | 4.62               | 539.57                                                           |
